# Supplementary material for: Flexibilins A–C, New Cembrane-Type Diterpenoids from the Formosan Soft Coral, Sinularia flexibilis
Source: MDPI journal article supplement (doi:10.3390/md11061999), 2013-06-10
Supplement: s1 [file s1]

marinedrugs-11-01999-s001.mol
  corina  04141422483D 1   1.00000     0.00000 
CORINA 3.49 0023  12.04.2013
 28 29  0  0  0  0  0  0  0  0999 V2000
   -0.2686    1.3907   -0.5002 C   0  0  0  0  0  0  0  0  0  0  0  0
   -0.0963   -0.1055   -0.4469 C   0  0  0  0  0  0  0  0  0  0  0  0
   -0.7606   -0.9575   -1.4431 C   0  0  0  0  0  0  0  0  0  0  0  0
   -1.4401   -0.3971   -2.4635 O   0  0  0  0  0  0  0  0  0  0  0  0
    1.1062    2.0617   -0.5230 C   0  0  0  0  0  0  0  0  0  0  0  0
   -1.0448    1.8588    0.7325 C   0  0  0  0  0  0  0  0  0  0  0  0
    2.0693    1.2228   -1.3655 C   0  0  0  0  0  0  0  0  0  0  0  0
   -1.3259    0.6614    1.6422 C   0  0  0  0  0  0  0  0  0  0  0  0
    3.4234    1.1371   -0.6583 C   0  0  0  0  0  0  0  0  0  0  0  0
   -0.7740    0.7061    3.0686 C   0  0  0  0  0  0  0  0  0  0  0  0
   -0.3235   -0.6133    3.6986 C   0  0  0  0  0  0  0  0  0  0  0  0
    3.6505   -0.2925   -0.1630 C   0  0  0  0  0  0  0  0  0  0  0  0
    1.0978   -0.4585    4.2435 C   0  0  0  0  0  0  0  0  0  0  0  0
    4.6383   -0.2767    1.0053 C   0  0  0  0  0  0  0  0  0  0  0  0
    4.1700   -1.2575    2.0821 C   0  0  0  0  0  0  0  0  0  0  0  0
    2.0689   -1.1496    3.3214 C   0  0  0  0  0  0  0  0  0  0  0  0
    3.1979   -0.5662    3.0030 C   0  0  0  0  0  0  0  0  0  0  0  0
    3.5240    0.7968    3.5572 C   0  0  0  0  0  0  0  0  0  0  0  0
   -2.1641    0.8690    2.7807 O   0  0  0  0  0  0  0  0  0  0  0  0
   -1.3741   -0.3081    1.1466 H   0  0  0  0  0  0  0  0  0  0  0  0
    4.5351    1.5204   -1.6372 C   0  0  0  0  0  0  0  0  0  0  0  0
    4.1824   -1.0860   -1.2258 O   0  0  0  0  0  0  0  0  0  0  0  0
    3.4377    2.0344    0.4537 O   0  0  0  0  0  0  0  0  0  0  0  0
   -0.8198    1.6611   -1.4008 H   0  0  0  0  0  0  0  0  0  0  0  0
    0.0167    1.9466    3.4889 C   0  0  0  0  0  0  0  0  0  0  0  0
    2.7028   -0.7172    0.1682 H   0  0  0  0  0  0  0  0  0  0  0  0
   -0.6974   -2.1674   -1.3469 O   0  0  0  0  0  0  0  0  0  0  0  0
    0.6574   -0.6552    0.5022 C   0  0  0  0  0  0  0  0  0  0  0  0
  1  2  1  0      
  2  3  1  0      
  3  4  1  0      
  1  5  1  0      
  1  6  1  0      
  5  7  1  0      
  6  8  1  0      
  7  9  1  0      
  8 10  1  0      
 10 11  1  0      
  9 12  1  0      
 11 13  1  0      
 12 14  1  0      
 14 15  1  0      
 13 16  1  0      
 16 17  2  0      
 15 17  1  0      
 17 18  1  0      
  8 19  1  0      
 10 19  1  0      
  8 20  1  0      
  9 21  1  0      
 12 22  1  0      
  9 23  1  0      
  1 24  1  0      
 10 25  1  0      
 12 26  1  0      
  3 27  2  0      
  2 28  2  0      
M  END
$$$$
