# Supplementary material for: Flexibilins A–C, New Cembrane-Type Diterpenoids from the Formosan Soft Coral, Sinularia flexibilis
Source: MDPI journal article supplement (doi:10.3390/md11061999), 2013-06-10
Supplement: s2 [file s2]

marinedrugs-11-01999-s001.mol
  ChemDraw01301415092D

 28 29  0  0  0  0  0  0  0  0999 V2000
    0.9921    0.0854    0.0000 C   0  0  0  0  0  0  0  0  0  0  0  0
    1.8171    0.0854    0.0000 C   0  0  0  0  0  0  0  0  0  0  0  0
    2.2296    0.7999    0.0000 C   0  0  0  0  0  0  0  0  0  0  0  0
    1.8171    1.5144    0.0000 O   0  0  0  0  0  0  0  0  0  0  0  0
    0.5796    0.7999    0.0000 C   0  0  0  0  0  0  0  0  0  0  0  0
    0.5796   -0.6290    0.0000 C   0  0  0  0  0  0  0  0  0  0  0  0
   -0.2454    0.7999    0.0000 C   0  0  0  0  0  0  0  0  0  0  0  0
   -0.2454   -0.6290    0.0000 C   0  0  0  0  0  0  0  0  0  0  0  0
   -0.9599    1.2124    0.0000 C   0  0  0  0  0  0  0  0  0  0  0  0
   -0.8288   -1.2124    0.0000 C   0  0  0  0  0  0  0  0  0  0  0  0
   -1.5432   -0.7999    0.0000 C   0  0  0  0  0  0  0  0  0  0  0  0
   -1.6743    0.7999    0.0000 C   0  0  0  0  0  0  0  0  0  0  0  0
   -2.3401   -1.0134    0.0000 C   0  0  0  0  0  0  0  0  0  0  0  0
   -2.4712    1.0134    0.0000 C   0  0  0  0  0  0  0  0  0  0  0  0
   -3.0546    0.4301    0.0000 C   0  0  0  0  0  0  0  0  0  0  0  0
   -3.0546   -0.6009    0.0000 C   0  0  0  0  0  0  0  0  0  0  0  0
   -2.4110   -0.0796    0.0000 C   0  0  0  0  0  0  0  0  0  0  0  0
   -1.5860   -0.0796    0.0000 C   0  0  0  0  0  0  0  0  0  0  0  0
   -0.2454   -1.4540    0.0000 O   0  0  0  0  0  0  0  0  0  0  0  0
   -0.0319    0.1678    0.0000 H   0  0  0  0  0  0  0  0  0  0  0  0
   -1.5432    1.7958    0.0000 C   0  0  0  0  0  0  0  0  0  0  0  0
   -2.0662    0.1679    0.0000 O   0  0  0  0  0  0  0  0  0  0  0  0
   -0.5474    1.9269    0.0000 O   0  0  0  0  0  0  0  0  0  0  0  0
    1.4046    0.7999    0.0000 H   0  0  0  0  0  0  0  0  0  0  0  0
   -1.2413   -1.9269    0.0000 C   0  0  0  0  0  0  0  0  0  0  0  0
   -0.9599    0.3874    0.0000 H   0  0  0  0  0  0  0  0  0  0  0  0
    3.0546    0.7999    0.0000 O   0  0  0  0  0  0  0  0  0  0  0  0
    2.2296   -0.6290    0.0000 C   0  0  0  0  0  0  0  0  0  0  0  0
  1  2  1  0      
  2  3  1  0      
  3  4  1  0      
  1  5  1  0      
  1  6  1  0      
  5  7  1  0      
  6  8  1  0      
  7  9  1  0      
  8 10  1  0      
 10 11  1  0      
  9 12  1  0      
 11 13  1  0      
 12 14  1  0      
 14 15  1  0      
 13 16  1  0      
 16 17  2  0      
 15 17  1  0      
 17 18  1  0      
  8 19  1  0      
 10 19  1  0      
  8 20  1  1      
  9 21  1  1      
 12 22  1  1      
  9 23  1  6      
  1 24  1  6      
 10 25  1  6      
 12 26  1  6      
  3 27  2  0      
  2 28  2  0      
M  END
