# Supplementary material for: Flexibilins A–C, New Cembrane-Type Diterpenoids from the Formosan Soft Coral, Sinularia flexibilis
Source: MDPI journal article supplement (doi:10.3390/md11061999), 2013-06-10
Supplement: s3 [file s3]

marinedrugs-11-01999-s002.mol
  corina  04141422483D 1   1.00000     0.00000 
CORINA 3.49 0023  12.04.2013
 27 28  0  0  0  0  0  0  0  0999 V2000
    0.5739    1.2664    0.4968 C   0  0  0  0  0  0  0  0  0  0  0  0
    0.8802   -0.2090    0.4753 C   0  0  0  0  0  0  0  0  0  0  0  0
    0.7671   -0.9647   -0.7799 C   0  0  0  0  0  0  0  0  0  0  0  0
    0.5048   -0.3192   -1.9339 O   0  0  0  0  0  0  0  0  0  0  0  0
    1.8770    2.0558    0.6376 C   0  0  0  0  0  0  0  0  0  0  0  0
   -0.3426    1.5799    1.6810 C   0  0  0  0  0  0  0  0  0  0  0  0
    3.0143    1.2873   -0.0385 C   0  0  0  0  0  0  0  0  0  0  0  0
   -1.3028    0.4101    1.9065 C   0  0  0  0  0  0  0  0  0  0  0  0
    4.2121    1.2099    0.9102 C   0  0  0  0  0  0  0  0  0  0  0  0
   -1.1086   -0.4384    3.1648 C   0  0  0  0  0  0  0  0  0  0  0  0
    0.0335   -0.0596    4.1097 C   0  0  0  0  0  0  0  0  0  0  0  0
    4.0662    0.0071    1.8063 C   0  0  0  0  0  0  0  0  0  0  0  0
    0.5705   -1.3187    4.7927 C   0  0  0  0  0  0  0  0  0  0  0  0
    4.8316   -0.0639    3.1026 C   0  0  0  0  0  0  0  0  0  0  0  0
    4.3137   -1.2369    3.9371 C   0  0  0  0  0  0  0  0  0  0  0  0
    1.9269   -1.6573    4.2306 C   0  0  0  0  0  0  0  0  0  0  0  0
    2.9578   -0.8947    4.4989 C   0  0  0  0  0  0  0  0  0  0  0  0
    2.7881    0.3248    5.3677 C   0  0  0  0  0  0  0  0  0  0  0  0
   -2.1908    0.4841    3.0237 O   0  0  0  0  0  0  0  0  0  0  0  0
   -1.6588   -0.0902    1.0062 H   0  0  0  0  0  0  0  0  0  0  0  0
    5.5010    1.0853    0.0952 C   0  0  0  0  0  0  0  0  0  0  0  0
    4.2654    2.3944    1.7077 O   0  0  0  0  0  0  0  0  0  0  0  0
    0.0771    1.5479   -0.4317 H   0  0  0  0  0  0  0  0  0  0  0  0
    0.9100   -2.1716   -0.7776 O   0  0  0  0  0  0  0  0  0  0  0  0
    1.2531   -0.8275    1.5931 C   0  0  0  0  0  0  0  0  0  0  0  0
    3.3357   -0.8996    1.4860 O   0  0  0  0  0  0  0  0  0  0  0  0
   -1.4289   -1.9318    3.0746 C   0  0  0  0  0  0  0  0  0  0  0  0
  1  2  1  0      
  2  3  1  0      
  3  4  1  0      
  1  5  1  0      
  1  6  1  0      
  5  7  1  0      
  6  8  1  0      
  7  9  1  0      
  8 10  1  0      
 10 11  1  0      
  9 12  1  0      
 11 13  1  0      
 12 14  1  0      
 14 15  1  0      
 13 16  1  0      
 16 17  2  0      
 15 17  1  0      
 17 18  1  0      
  8 19  1  0      
 10 19  1  0      
  8 20  1  0      
  9 21  1  0      
  9 22  1  0      
  1 23  1  0      
  3 24  2  0      
  2 25  2  0      
 12 26  2  0      
 10 27  1  0      
M  END
$$$$
