# Supplementary material for: Flexibilins A–C, New Cembrane-Type Diterpenoids from the Formosan Soft Coral, Sinularia flexibilis
Source: MDPI journal article supplement (doi:10.3390/md11061999), 2013-06-10
Supplement: s5 [file s5]

marinedrugs-11-01999-s003.mol
  corina  04141422483D 1   1.00000     0.00000 
CORINA 3.49 0023  12.04.2013
 26 27  0  0  0  0  0  0  0  0999 V2000
   -0.4009    1.6440    0.7866 C   0  0  0  0  0  0  0  0  0  0  0  0
   -0.4491    0.1379    0.9574 C   0  0  0  0  0  0  0  0  0  0  0  0
   -0.2767   -0.6483   -0.2791 C   0  0  0  0  0  0  0  0  0  0  0  0
    1.0484    2.1130    0.9144 C   0  0  0  0  0  0  0  0  0  0  0  0
   -1.1901    2.2518    1.9689 C   0  0  0  0  0  0  0  0  0  0  0  0
    1.7977    1.2501   -0.1180 C   0  0  0  0  0  0  0  0  0  0  0  0
   -1.2531    3.7694    1.7866 C   0  0  0  0  0  0  0  0  0  0  0  0
    0.8883    1.2053   -1.3413 C   0  0  0  0  0  0  0  0  0  0  0  0
   -2.6639    4.1732    1.3538 C   0  0  0  0  0  0  0  0  0  0  0  0
   -2.7203    5.6880    1.1457 C   0  0  0  0  0  0  0  0  0  0  0  0
    0.1226    2.4690   -1.5632 C   0  0  0  0  0  0  0  0  0  0  0  0
   -3.0469    5.9905   -0.3182 C   0  0  0  0  0  0  0  0  0  0  0  0
   -0.8555    2.5916   -2.7030 C   0  0  0  0  0  0  0  0  0  0  0  0
   -1.0963    4.0705   -3.0126 C   0  0  0  0  0  0  0  0  0  0  0  0
   -1.9404    5.4677   -1.1974 C   0  0  0  0  0  0  0  0  0  0  0  0
   -2.2053    4.5937   -2.1363 C   0  0  0  0  0  0  0  0  0  0  0  0
   -3.6183    4.1123   -2.3424 C   0  0  0  0  0  0  0  0  0  0  0  0
   -2.9946    3.5119    0.1310 O   0  0  0  0  0  0  0  0  0  0  0  0
   -0.9319    4.4113    3.0222 O   0  0  0  0  0  0  0  0  0  0  0  0
    1.8611    1.1032   -2.5624 C   0  0  0  0  0  0  0  0  0  0  0  0
   -0.9130    1.9249   -0.1054 H   0  0  0  0  0  0  0  0  0  0  0  0
   -0.4900   -1.8446   -0.2993 O   0  0  0  0  0  0  0  0  0  0  0  0
   -0.6341   -0.4364    2.1437 C   0  0  0  0  0  0  0  0  0  0  0  0
    0.2896    3.4049   -0.8186 O   0  0  0  0  0  0  0  0  0  0  0  0
   -3.6650    3.7700    2.4383 C   0  0  0  0  0  0  0  0  0  0  0  0
    0.1218    0.0020   -1.3754 O   0  0  0  0  0  0  0  0  0  0  0  0
  1  2  1  0      
  2  3  1  0      
  1  4  1  0      
  1  5  1  0      
  4  6  1  0      
  5  7  1  0      
  6  8  1  0      
  7  9  1  0      
  9 10  1  0      
  8 11  1  0      
 10 12  1  0      
 11 13  1  0      
 13 14  1  0      
 12 15  1  0      
 15 16  2  0      
 14 16  1  0      
 16 17  1  0      
  7 19  1  0      
  8 20  1  0      
  1 21  1  0      
  3 22  2  0      
  2 23  2  0      
 11 24  2  0      
  9 25  1  0      
  3 26  1  0      
  8 26  1  0      
  9 18  1  0      
M  END
$$$$
