# Supplementary material for: Flexibilins A–C, New Cembrane-Type Diterpenoids from the Formosan Soft Coral, Sinularia flexibilis
Source: MDPI journal article supplement (doi:10.3390/md11061999), 2013-06-10
Supplement: s6 [file s6]

marinedrugs-11-01999-s003.mol
  ChemDraw01301415092D

 26 27  0  0  0  0  0  0  0  0999 V2000
    0.9921    0.1510    0.0000 C   0  0  0  0  0  0  0  0  0  0  0  0
    1.8171    0.1510    0.0000 C   0  0  0  0  0  0  0  0  0  0  0  0
    2.2296    0.8655    0.0000 C   0  0  0  0  0  0  0  0  0  0  0  0
    0.5796    0.8655    0.0000 C   0  0  0  0  0  0  0  0  0  0  0  0
    0.5796   -0.5635    0.0000 C   0  0  0  0  0  0  0  0  0  0  0  0
   -0.2454    0.8655    0.0000 C   0  0  0  0  0  0  0  0  0  0  0  0
   -0.2454   -0.5635    0.0000 C   0  0  0  0  0  0  0  0  0  0  0  0
   -0.9599    1.2780    0.0000 C   0  0  0  0  0  0  0  0  0  0  0  0
   -0.8288   -1.1468    0.0000 C   0  0  0  0  0  0  0  0  0  0  0  0
   -1.5432   -0.7343    0.0000 C   0  0  0  0  0  0  0  0  0  0  0  0
   -1.6743    0.8655    0.0000 C   0  0  0  0  0  0  0  0  0  0  0  0
   -2.3401   -0.9479    0.0000 C   0  0  0  0  0  0  0  0  0  0  0  0
   -2.4712    1.0790    0.0000 C   0  0  0  0  0  0  0  0  0  0  0  0
   -3.0546    0.4956    0.0000 C   0  0  0  0  0  0  0  0  0  0  0  0
   -3.0546   -0.5354    0.0000 C   0  0  0  0  0  0  0  0  0  0  0  0
   -2.4110   -0.0140    0.0000 C   0  0  0  0  0  0  0  0  0  0  0  0
   -1.5860   -0.0140    0.0000 C   0  0  0  0  0  0  0  0  0  0  0  0
   -0.2454   -1.7302    0.0000 O   0  0  0  0  0  0  0  0  0  0  0  0
   -0.0319    0.2334    0.0000 O   0  0  0  0  0  0  0  0  0  0  0  0
   -1.5432    1.8613    0.0000 C   0  0  0  0  0  0  0  0  0  0  0  0
    1.4046    0.8655    0.0000 H   0  0  0  0  0  0  0  0  0  0  0  0
    3.0546    0.8655    0.0000 O   0  0  0  0  0  0  0  0  0  0  0  0
    2.2296   -0.5635    0.0000 C   0  0  0  0  0  0  0  0  0  0  0  0
   -1.5021    0.2129    0.0000 O   0  0  0  0  0  0  0  0  0  0  0  0
   -1.2413   -1.8613    0.0000 C   0  0  0  0  0  0  0  0  0  0  0  0
    1.0333    1.4091    0.0000 O   0  0  0  0  0  0  0  0  0  0  0  0
  1  2  1  0      
  2  3  1  0      
  1  4  1  0      
  1  5  1  0      
  4  6  1  0      
  5  7  1  0      
  6  8  1  0      
  7  9  1  0      
  9 10  1  0      
  8 11  1  0      
 10 12  1  0      
 11 13  1  0      
 13 14  1  0      
 12 15  1  0      
 15 16  2  0      
 14 16  1  0      
 16 17  1  0      
  7 19  1  1      
  8 20  1  1      
  1 21  1  6      
  3 22  2  0      
  2 23  2  0      
 11 24  2  0      
  9 25  1  1      
  3 26  1  0      
  8 26  1  6      
  9 18  1  6      
M  END
