# Supplementary material for: Flexibilins A–C, New Cembrane-Type Diterpenoids from the Formosan Soft Coral, Sinularia flexibilis
Source: MDPI journal article supplement (doi:10.3390/md11061999), 2013-06-10
Supplement: s7 [file s7]

marinedrugs-11-01999-s004.mol
  corina  04141422483D 1   1.00000     0.00000 
CORINA 3.49 0023  12.04.2013
 25 26  0  0  0  0  0  0  0  0999 V2000
    0.4271    1.2267   -0.4714 C   0  0  0  0  0  0  0  0  0  0  0  0
    0.4294   -0.2790   -0.6305 C   0  0  0  0  0  0  0  0  0  0  0  0
    0.2563   -0.8084   -1.9938 C   0  0  0  0  0  0  0  0  0  0  0  0
    1.8370    1.7808   -0.6516 C   0  0  0  0  0  0  0  0  0  0  0  0
   -0.0163    1.4981    0.9836 C   0  0  0  0  0  0  0  0  0  0  0  0
    2.4763    0.9030   -1.7333 C   0  0  0  0  0  0  0  0  0  0  0  0
   -0.2226    2.9826    1.2480 C   0  0  0  0  0  0  0  0  0  0  0  0
    1.6157    0.9705   -2.9807 C   0  0  0  0  0  0  0  0  0  0  0  0
   -1.0790    3.5938    0.1686 C   0  0  0  0  0  0  0  0  0  0  0  0
   -0.5950    4.5286   -0.6030 C   0  0  0  0  0  0  0  0  0  0  0  0
    1.1374    2.3599   -3.3744 C   0  0  0  0  0  0  0  0  0  0  0  0
   -1.4094    5.1382   -1.7253 C   0  0  0  0  0  0  0  0  0  0  0  0
    0.5495    2.2984   -4.7887 C   0  0  0  0  0  0  0  0  0  0  0  0
   -0.5553    3.3244   -5.0108 C   0  0  0  0  0  0  0  0  0  0  0  0
   -1.3437    4.1908   -2.8950 C   0  0  0  0  0  0  0  0  0  0  0  0
   -0.5651    4.3731   -3.9286 C   0  0  0  0  0  0  0  0  0  0  0  0
    0.2941    5.5997   -4.0806 C   0  0  0  0  0  0  0  0  0  0  0  0
    2.6286    0.6030   -4.1312 C   0  0  0  0  0  0  0  0  0  0  0  0
   -0.3153    1.6540   -1.1154 H   0  0  0  0  0  0  0  0  0  0  0  0
   -0.1810   -1.9327   -2.1702 O   0  0  0  0  0  0  0  0  0  0  0  0
    0.5772   -1.1043    0.4108 C   0  0  0  0  0  0  0  0  0  0  0  0
    2.2485    3.2611   -3.3562 O   0  0  0  0  0  0  0  0  0  0  0  0
    0.6521   -0.0707   -3.0244 O   0  0  0  0  0  0  0  0  0  0  0  0
   -2.5047    3.1167    0.0193 C   0  0  0  0  0  0  0  0  0  0  0  0
    1.0339    3.6510    1.3265 O   0  0  0  0  0  0  0  0  0  0  0  0
  1  2  1  0      
  2  3  1  0      
  1  4  1  0      
  1  5  1  0      
  4  6  1  0      
  5  7  1  0      
  6  8  1  0      
  7  9  1  0      
  9 10  2  0      
  8 11  1  0      
 10 12  1  0      
 11 13  1  0      
 13 14  1  0      
 12 15  1  0      
 15 16  2  0      
 14 16  1  0      
 16 17  1  0      
  8 18  1  0      
  1 19  1  0      
  3 20  2  0      
  2 21  2  0      
  3 23  1  0      
  8 23  1  0      
  9 24  1  0      
  7 25  1  0      
 11 22  1  0      
M  END
$$$$
