# Supplementary material for: Flexibilins A–C, New Cembrane-Type Diterpenoids from the Formosan Soft Coral, Sinularia flexibilis
Source: MDPI journal article supplement (doi:10.3390/md11061999), 2013-06-10
Supplement: s8 [file s8]

marinedrugs-11-01999-s004.mol
  ChemDraw01301415092D

 25 26  0  0  0  0  0  0  0  0999 V2000
    0.9921    0.2062    0.0000 C   0  0  0  0  0  0  0  0  0  0  0  0
    1.8171    0.2062    0.0000 C   0  0  0  0  0  0  0  0  0  0  0  0
    2.2296    0.9207    0.0000 C   0  0  0  0  0  0  0  0  0  0  0  0
    0.5796    0.9207    0.0000 C   0  0  0  0  0  0  0  0  0  0  0  0
    0.5796   -0.5082    0.0000 C   0  0  0  0  0  0  0  0  0  0  0  0
   -0.2454    0.9207    0.0000 C   0  0  0  0  0  0  0  0  0  0  0  0
   -0.2454   -0.5082    0.0000 C   0  0  0  0  0  0  0  0  0  0  0  0
   -0.9599    1.3332    0.0000 C   0  0  0  0  0  0  0  0  0  0  0  0
   -0.8288   -1.0916    0.0000 C   0  0  0  0  0  0  0  0  0  0  0  0
   -1.5432   -0.6791    0.0000 C   0  0  0  0  0  0  0  0  0  0  0  0
   -1.6743    0.9207    0.0000 C   0  0  0  0  0  0  0  0  0  0  0  0
   -2.3401   -0.8926    0.0000 C   0  0  0  0  0  0  0  0  0  0  0  0
   -2.4712    1.1342    0.0000 C   0  0  0  0  0  0  0  0  0  0  0  0
   -3.0546    0.5509    0.0000 C   0  0  0  0  0  0  0  0  0  0  0  0
   -3.0546   -0.4801    0.0000 C   0  0  0  0  0  0  0  0  0  0  0  0
   -2.4110    0.0412    0.0000 C   0  0  0  0  0  0  0  0  0  0  0  0
   -1.5860    0.0412    0.0000 C   0  0  0  0  0  0  0  0  0  0  0  0
   -1.5432    1.9166    0.0000 C   0  0  0  0  0  0  0  0  0  0  0  0
    1.4046    0.9207    0.0000 H   0  0  0  0  0  0  0  0  0  0  0  0
    3.0546    0.9207    0.0000 O   0  0  0  0  0  0  0  0  0  0  0  0
    2.2296   -0.5082    0.0000 C   0  0  0  0  0  0  0  0  0  0  0  0
   -1.9291    0.2682    0.0000 O   0  0  0  0  0  0  0  0  0  0  0  0
    1.0333    1.4644    0.0000 O   0  0  0  0  0  0  0  0  0  0  0  0
   -0.8288   -1.9166    0.0000 C   0  0  0  0  0  0  0  0  0  0  0  0
    0.1671   -1.2227    0.0000 O   0  0  0  0  0  0  0  0  0  0  0  0
  1  2  1  0      
  2  3  1  0      
  1  4  1  0      
  1  5  1  0      
  4  6  1  0      
  5  7  1  0      
  6  8  1  0      
  7  9  1  0      
  9 10  2  0      
  8 11  1  0      
 10 12  1  0      
 11 13  1  0      
 13 14  1  0      
 12 15  1  0      
 15 16  2  0      
 14 16  1  0      
 16 17  1  0      
  8 18  1  1      
  1 19  1  6      
  3 20  2  0      
  2 21  2  0      
  3 23  1  0      
  8 23  1  6      
  9 24  1  0      
  7 25  1  6      
 11 22  1  1      
M  END
